# Supplementary material
Source: publisher figshare collection journal article supplement (https://acs.figshare.com/ndownloader/files/3801298)
Supplement: Supplementary file 1 [file 3801298]

 
data_ca040213_0m 
  
_audit_creation_method            SHELXL-97 

_publ_contact_author_name 'B. Schweizer'
_publ_contact_author_email 'schweizer@org.chem.ethz.ch'
	
_chemical_name_systematic 
; 
 ? 
; 
_chemical_name_common             ? 
_chemical_melting_point           ? 
_chemical_formula_moiety          'C23 H33 N O9'  
_chemical_formula_sum 
 'C23 H33 N O9' 
_chemical_formula_weight          467.50 
  
loop_ 
 _atom_type_symbol 
 _atom_type_description 
 _atom_type_scat_dispersion_real 
 _atom_type_scat_dispersion_imag 
 _atom_type_scat_source 
 'C'  'C'   0.0033   0.0016 
 'International Tables Vol C Tables 4.2.6.8 and 6.1.1.4' 
 'H'  'H'   0.0000   0.0000 
 'International Tables Vol C Tables 4.2.6.8 and 6.1.1.4' 
 'N'  'N'   0.0061   0.0033 
 'International Tables Vol C Tables 4.2.6.8 and 6.1.1.4' 
 'O'  'O'   0.0106   0.0060 
 'International Tables Vol C Tables 4.2.6.8 and 6.1.1.4' 
  
_symmetry_cell_setting            Triclinic 
_symmetry_space_group_name_H-M    P-1 
  
loop_ 
 _symmetry_equiv_pos_as_xyz 
 'x, y, z' 
 '-x, -y, -z' 
  
_cell_length_a                    9.9057(10) 
_cell_length_b                    10.7324(11) 
_cell_length_c                    12.5346(14) 
_cell_angle_alpha                 108.396(3) 
_cell_angle_beta                  93.920(4) 
_cell_angle_gamma                 101.374(3) 
_cell_volume                      1227.4(2) 
_cell_formula_units_Z             2 
_cell_measurement_temperature     100(2) 
_cell_measurement_reflns_used     4076 
_cell_measurement_theta_min       2.59 
_cell_measurement_theta_max       27.47 
  
_exptl_crystal_description        prism 
_exptl_crystal_colour             colourless 
_exptl_crystal_size_max           0.26 
_exptl_crystal_size_mid           0.20 
_exptl_crystal_size_min           0.15 
_exptl_crystal_density_meas       ? 
_exptl_crystal_density_diffrn     1.265 
_exptl_crystal_density_method     'not measured' 
_exptl_crystal_F_000              500 
_exptl_absorpt_coefficient_mu     0.097 
_exptl_absorpt_correction_type    multi-scan 
_exptl_absorpt_correction_T_min   0.9751 
_exptl_absorpt_correction_T_max   0.9856 
_exptl_absorpt_process_details    SADABS 
  
_exptl_special_details 
; 
 ? 
; 
  
_diffrn_ambient_temperature       100(2) 
_diffrn_radiation_wavelength      0.71073 
_diffrn_radiation_type            MoK\a 
_diffrn_radiation_source          'fine-focus sealed tube' 
_diffrn_radiation_monochromator   graphite 
_diffrn_measurement_device_type   'Bruker APEX-II CCD' 
_diffrn_measurement_method        '\f and \w scans' 
_diffrn_detector_area_resol_mean  ? 
_diffrn_reflns_number             14014 
_diffrn_reflns_av_R_equivalents   0.0304 
_diffrn_reflns_av_sigmaI/netI     0.0449 
_diffrn_reflns_limit_h_min        -12 
_diffrn_reflns_limit_h_max        12 
_diffrn_reflns_limit_k_min        -13 
_diffrn_reflns_limit_k_max        13 
_diffrn_reflns_limit_l_min        -16 
_diffrn_reflns_limit_l_max        16 
_diffrn_reflns_theta_min          2.54 
_diffrn_reflns_theta_max          27.50 
_reflns_number_total              5610 
_reflns_number_gt                 4260 
_reflns_threshold_expression      >2sigma(I) 
  
_computing_data_collection        'Bruker APEX2' 
_computing_cell_refinement        'Bruker SAINT' 
_computing_data_reduction         'Bruker SAINT' 
_computing_structure_solution     'SHELXS-97 (Sheldrick, 2008)'

_publ_section_references
;
Bruker (2010). SAINT Release 7.68A. Integration Software for Single Crystal
Data. Bruker AXS Inc., Madison, USA.

PLATON (C) 1980-2007 A.L.Spek, Utrecht University, Padualaan 8,
3584 CH, Utrecht, The Netherlands.

Johnson, C. K. (1976). ORTEP-II. A Fortran Thermal-Ellipsoid Plot
Program. Report ORNL-5138. Oak Ridge National Laboratory, Oak Ridge,
Tennessee, USA.

Dolomanov, O. V., Bourhis, L. J., Gildea, R. J., Howard, J. A. K. & Puschmann,
H. (2009). OLEX2: a complete structure solution, refinement and analysis
program. J. Appl. Cryst. 42, 339-341.

Sheldrick, G.M. (2008). Acta Cryst. A64, 112-122.

;
 
_computing_structure_refinement  
	 'OLEX2 (Dolomanov, 2009), SHELXL-97 (Sheldrick, 2008)' 
_computing_molecular_graphics     'Platon, Ortep' 
_computing_publication_material   'Bruker SHELXTL' 
  
_refine_special_details 
; 
 Refinement of F^2^ against ALL reflections.  The weighted R-factor wR and 
 goodness of fit S are based on F^2^, conventional R-factors R are based 
 on F, with F set to zero for negative F^2^. The threshold expression of 
 F^2^ > 2sigma(F^2^) is used only for calculating R-factors(gt) etc. and is 
 not relevant to the choice of reflections for refinement.  R-factors based 
 on F^2^ are statistically about twice as large as those based on F, and R- 
 factors based on ALL data will be even larger. 
; 
  
_refine_ls_structure_factor_coef  Fsqd 
_refine_ls_matrix_type            full 
_refine_ls_weighting_scheme       calc 
_refine_ls_weighting_details 
 'calc w=1/[\s^2^(Fo^2^)+(0.0500P)^2^+0.0000P] where P=(Fo^2^+2Fc^2^)/3' 
_atom_sites_solution_primary      direct 
_atom_sites_solution_secondary    difmap 
_atom_sites_solution_hydrogens    difmap 
_refine_ls_hydrogen_treatment     refall 
_refine_ls_extinction_method      none 
_refine_ls_extinction_coef        ? 
_refine_ls_number_reflns          5610 
_refine_ls_number_parameters      430 
_refine_ls_number_restraints      0 
_refine_ls_R_factor_all           0.0623 
_refine_ls_R_factor_gt            0.0427 
_refine_ls_wR_factor_ref          0.1095 
_refine_ls_wR_factor_gt           0.0992 
_refine_ls_goodness_of_fit_ref    1.156 
_refine_ls_restrained_S_all       1.156 
_refine_ls_shift/su_max           0.000 
_refine_ls_shift/su_mean          0.000 
  
loop_ 
 _atom_site_label 
 _atom_site_type_symbol 
 _atom_site_fract_x 
 _atom_site_fract_y 
 _atom_site_fract_z 
 _atom_site_U_iso_or_equiv 
 _atom_site_adp_type 
 _atom_site_occupancy 
 _atom_site_symmetry_multiplicity 
 _atom_site_calc_flag 
 _atom_site_refinement_flags 
 _atom_site_disorder_assembly 
 _atom_site_disorder_group 
O5 O 0.93385(10) 0.65074(9) 0.81143(9) 0.0172(2) Uani 1 1 d . . . 
O10 O 0.45027(11) 0.57891(10) 0.78133(9) 0.0226(3) Uani 1 1 d . . . 
O11 O 0.50015(10) 0.37095(9) 0.73168(9) 0.0177(2) Uani 1 1 d . . . 
O16 O 0.69082(11) 0.77362(10) 0.97285(10) 0.0254(3) Uani 1 1 d . . . 
O19 O 0.94252(11) 0.34734(10) 0.51306(9) 0.0240(3) Uani 1 1 d . . . 
O20 O 0.71892(11) 0.33616(11) 0.45983(10) 0.0278(3) Uani 1 1 d . . . 
O23 O 0.91230(10) 0.33324(9) 0.80704(8) 0.0150(2) Uani 1 1 d . . . 
O25 O 0.78087(11) 0.14057(9) 0.67690(10) 0.0237(3) Uani 1 1 d . . . 
O26 O 0.96336(10) 0.14617(9) 0.79999(8) 0.0160(2) Uani 1 1 d . . . 
N1 N 0.64784(12) 0.54263(11) 0.85921(10) 0.0154(3) Uani 1 1 d . . . 
C2 C 0.71788(15) 0.66529(14) 0.94134(13) 0.0175(3) Uani 1 1 d . . . 
C3 C 0.83787(15) 0.60439(14) 0.96835(13) 0.0162(3) Uani 1 1 d . . . 
C4 C 0.96845(16) 0.65883(15) 0.92635(13) 0.0181(3) Uani 1 1 d . . . 
C6 C 0.90742(15) 0.51587(13) 0.73388(12) 0.0154(3) Uani 1 1 d . . . 
C7 C 0.82131(14) 0.40936(13) 0.77601(12) 0.0143(3) Uani 1 1 d . . . 
C8 C 0.75118(14) 0.46703(13) 0.88101(12) 0.0144(3) Uani 1 1 d . . . 
C9 C 0.52168(15) 0.50275(13) 0.78802(12) 0.0156(3) Uani 1 1 d . . . 
C12 C 0.37567(15) 0.29814(14) 0.64596(13) 0.0189(3) Uani 1 1 d . . . 
C13 C 0.39717(19) 0.15543(16) 0.60774(16) 0.0265(4) Uani 1 1 d . . . 
C14 C 0.24545(18) 0.30647(19) 0.70217(18) 0.0305(4) Uani 1 1 d . . . 
C15 C 0.37843(19) 0.35529(17) 0.54979(15) 0.0261(4) Uani 1 1 d . . . 
C17 C 0.83542(16) 0.51681(14) 0.62360(13) 0.0169(3) Uani 1 1 d . . . 
C18 C 0.84072(15) 0.39238(14) 0.52699(13) 0.0176(3) Uani 1 1 d . . . 
C21 C 0.7165(2) 0.21587(19) 0.36207(17) 0.0351(4) Uani 1 1 d . . . 
C22 C 0.5696(2) 0.15396(18) 0.30970(16) 0.0306(4) Uani 1 1 d . . . 
C24 C 0.87479(15) 0.19768(13) 0.75274(12) 0.0153(3) Uani 1 1 d . . . 
C27 C 0.95088(15) -0.00281(13) 0.75872(13) 0.0171(3) Uani 1 1 d . . . 
C28 C 1.06999(17) -0.01704(15) 0.83230(15) 0.0224(3) Uani 1 1 d . . . 
C29 C 0.97018(19) -0.04904(16) 0.63448(14) 0.0231(4) Uani 1 1 d . . . 
C30 C 0.81203(18) -0.07245(16) 0.78014(18) 0.0286(4) Uani 1 1 d . . . 
C31 C 0.69817(15) 0.36262(14) 0.92951(12) 0.0167(3) Uani 1 1 d . . . 
C32 C 0.66348(15) 0.27534(14) 0.96815(13) 0.0186(3) Uani 1 1 d . . . 
C33 C 0.6224(2) 0.16872(17) 1.01658(17) 0.0271(4) Uani 1 1 d . . . 
H14A H 0.1651(19) 0.2504(18) 0.6477(16) 0.034(5) Uiso 1 1 d . . . 
H14B H 0.2338(19) 0.3986(19) 0.7292(16) 0.034(5) Uiso 1 1 d . . . 
H14C H 0.247(2) 0.2664(19) 0.7672(19) 0.044(6) Uiso 1 1 d . . . 
H7 H 0.7496(16) 0.3463(15) 0.7153(14) 0.016(4) Uiso 1 1 d . . . 
H6 H 0.9936(16) 0.4881(14) 0.7202(13) 0.011(4) Uiso 1 1 d . . . 
H17A H 0.7394(18) 0.5256(15) 0.6284(14) 0.018(4) Uiso 1 1 d . . . 
H17B H 0.8839(17) 0.5920(17) 0.6071(14) 0.023(4) Uiso 1 1 d . . . 
H21A H 0.7688(16) 0.2652(15) 0.3140(14) 0.018(4) Uiso 1 1 d . . . 
H21B H 0.758(2) 0.152(2) 0.3889(17) 0.045(6) Uiso 1 1 d . . . 
H22A H 0.5223(18) 0.2143(17) 0.2860(15) 0.026(4) Uiso 1 1 d . . . 
H22B H 0.514(2) 0.123(2) 0.3642(19) 0.053(6) Uiso 1 1 d . . . 
H22C H 0.565(2) 0.070(2) 0.2393(18) 0.049(6) Uiso 1 1 d . . . 
H13A H 0.4891(19) 0.1515(16) 0.5749(15) 0.030(5) Uiso 1 1 d . . . 
H13B H 0.3951(19) 0.1238(18) 0.6727(18) 0.040(5) Uiso 1 1 d . . . 
H13C H 0.322(2) 0.0982(19) 0.5482(18) 0.043(6) Uiso 1 1 d . . . 
H15A H 0.3618(17) 0.4467(18) 0.5719(15) 0.031(5) Uiso 1 1 d . . . 
H15B H 0.466(2) 0.3538(17) 0.5164(16) 0.036(5) Uiso 1 1 d . . . 
H15C H 0.303(2) 0.2954(19) 0.4881(18) 0.043(5) Uiso 1 1 d . . . 
H3 H 0.8544(16) 0.6087(15) 1.0469(15) 0.021(4) Uiso 1 1 d . . . 
H4A H 1.0379(15) 0.6090(14) 0.9313(13) 0.010(4) Uiso 1 1 d . . . 
H4B H 1.0087(14) 0.7556(14) 0.9709(13) 0.011(4) Uiso 1 1 d . . . 
H28A H 1.0704(15) -0.1122(16) 0.8139(13) 0.018(4) Uiso 1 1 d . . . 
H28B H 1.1629(19) 0.0328(18) 0.8201(16) 0.033(5) Uiso 1 1 d . . . 
H28C H 1.0612(19) 0.0193(19) 0.9161(18) 0.042(5) Uiso 1 1 d . . . 
H29A H 0.8932(19) -0.0364(17) 0.5889(16) 0.034(5) Uiso 1 1 d . . . 
H29B H 0.9732(17) -0.1465(17) 0.6101(15) 0.026(4) Uiso 1 1 d . . . 
H29C H 1.0599(19) 0.0074(17) 0.6245(15) 0.030(5) Uiso 1 1 d . . . 
H30A H 0.735(2) -0.0590(17) 0.7325(16) 0.032(5) Uiso 1 1 d . . . 
H30B H 0.8037(19) -0.0338(18) 0.8627(18) 0.038(5) Uiso 1 1 d . . . 
H30C H 0.8082(17) -0.1729(17) 0.7585(15) 0.028(4) Uiso 1 1 d . . . 
H33A H 0.546(2) 0.175(2) 1.054(2) 0.058(7) Uiso 1 1 d . . . 
H33B H 0.612(2) 0.085(2) 0.963(2) 0.067(7) Uiso 1 1 d . . . 
H33C H 0.704(3) 0.179(3) 1.077(3) 0.095(9) Uiso 1 1 d . . . 
  
loop_ 
 _atom_site_aniso_label 
 _atom_site_aniso_U_11 
 _atom_site_aniso_U_22 
 _atom_site_aniso_U_33 
 _atom_site_aniso_U_23 
 _atom_site_aniso_U_13 
 _atom_site_aniso_U_12 
O5 0.0209(5) 0.0116(4) 0.0173(5) 0.0038(4) 0.0004(4) 0.0019(4) 
O10 0.0211(6) 0.0193(5) 0.0269(6) 0.0054(5) -0.0008(5) 0.0090(4) 
O11 0.0153(5) 0.0141(5) 0.0207(6) 0.0029(4) -0.0027(4) 0.0031(4) 
O16 0.0216(6) 0.0169(5) 0.0318(7) -0.0006(5) 0.0005(5) 0.0066(4) 
O19 0.0210(6) 0.0236(5) 0.0261(6) 0.0034(5) 0.0064(5) 0.0095(4) 
O20 0.0252(6) 0.0283(6) 0.0232(6) -0.0033(5) -0.0006(5) 0.0117(5) 
O23 0.0157(5) 0.0104(4) 0.0180(5) 0.0035(4) -0.0011(4) 0.0042(4) 
O25 0.0233(6) 0.0156(5) 0.0261(6) 0.0013(5) -0.0074(5) 0.0039(4) 
O26 0.0200(5) 0.0098(4) 0.0174(5) 0.0028(4) -0.0005(4) 0.0054(4) 
N1 0.0152(6) 0.0128(5) 0.0177(6) 0.0035(5) 0.0005(5) 0.0051(5) 
C2 0.0163(7) 0.0168(7) 0.0165(7) 0.0026(6) 0.0026(6) 0.0018(6) 
C3 0.0160(7) 0.0156(7) 0.0142(7) 0.0028(6) -0.0009(6) 0.0021(5) 
C4 0.0168(8) 0.0161(7) 0.0179(8) 0.0029(6) -0.0021(6) 0.0025(6) 
C6 0.0149(7) 0.0117(6) 0.0182(8) 0.0030(6) 0.0024(6) 0.0036(5) 
C7 0.0139(7) 0.0121(6) 0.0161(7) 0.0036(6) -0.0007(6) 0.0043(5) 
C8 0.0129(7) 0.0143(6) 0.0159(7) 0.0046(6) -0.0003(6) 0.0046(5) 
C9 0.0167(7) 0.0142(6) 0.0161(7) 0.0051(6) 0.0030(6) 0.0035(6) 
C12 0.0147(7) 0.0175(7) 0.0208(8) 0.0052(6) -0.0039(6) -0.0002(6) 
C13 0.0274(9) 0.0173(7) 0.0292(10) 0.0043(7) -0.0060(8) 0.0016(7) 
C14 0.0183(9) 0.0305(9) 0.0374(11) 0.0075(8) 0.0046(8) -0.0005(7) 
C15 0.0290(9) 0.0232(8) 0.0230(9) 0.0065(7) -0.0042(7) 0.0034(7) 
C17 0.0183(8) 0.0158(7) 0.0189(8) 0.0067(6) 0.0061(6) 0.0065(6) 
C18 0.0210(8) 0.0166(7) 0.0170(7) 0.0070(6) 0.0063(6) 0.0049(6) 
C21 0.0358(11) 0.0316(9) 0.0301(10) -0.0041(8) 0.0064(8) 0.0129(8) 
C22 0.0392(11) 0.0245(8) 0.0256(9) 0.0057(8) 0.0007(8) 0.0072(8) 
C24 0.0172(7) 0.0127(6) 0.0161(7) 0.0048(6) 0.0031(6) 0.0039(5) 
C27 0.0206(8) 0.0089(6) 0.0218(8) 0.0040(6) 0.0025(6) 0.0054(5) 
C28 0.0279(9) 0.0148(7) 0.0243(9) 0.0052(6) -0.0007(7) 0.0080(6) 
C29 0.0287(9) 0.0181(7) 0.0212(8) 0.0022(6) 0.0014(7) 0.0102(7) 
C30 0.0242(9) 0.0194(8) 0.0461(12) 0.0150(8) 0.0100(8) 0.0056(7) 
C31 0.0147(7) 0.0180(7) 0.0159(7) 0.0038(6) 0.0004(6) 0.0041(6) 
C32 0.0166(8) 0.0202(7) 0.0201(8) 0.0069(6) 0.0038(6) 0.0061(6) 
C33 0.0310(10) 0.0245(8) 0.0342(10) 0.0171(8) 0.0148(8) 0.0101(7) 
  
_geom_special_details 
; 
 All esds (except the esd in the dihedral angle between two l.s. planes) 
 are estimated using the full covariance matrix.  The cell esds are taken 
 into account individually in the estimation of esds in distances, angles 
 and torsion angles; correlations between esds in cell parameters are only 
 used when they are defined by crystal symmetry.  An approximate (isotropic) 
 treatment of cell esds is used for estimating esds involving l.s. planes. 
; 
  
loop_ 
 _geom_bond_atom_site_label_1 
 _geom_bond_atom_site_label_2 
 _geom_bond_distance 
 _geom_bond_site_symmetry_2 
 _geom_bond_publ_flag 
O5 C6 1.4270(16) . ? 
O5 C4 1.4288(19) . ? 
O10 C9 1.1995(17) . ? 
O11 C9 1.3324(16) . ? 
O11 C12 1.4814(18) . ? 
O16 C2 1.1947(16) . ? 
O19 C18 1.2017(17) . ? 
O20 C18 1.3349(19) . ? 
O20 C21 1.4676(19) . ? 
O23 C24 1.3584(16) . ? 
O23 C7 1.4401(16) . ? 
O25 C24 1.1965(17) . ? 
O26 C24 1.3239(17) . ? 
O26 C27 1.4936(15) . ? 
N1 C9 1.3917(19) . ? 
N1 C2 1.4003(18) . ? 
N1 C8 1.4866(18) . ? 
C2 C3 1.532(2) . ? 
C3 C4 1.510(2) . ? 
C3 C8 1.5693(19) . ? 
C3 H3 0.972(18) . ? 
C4 H4A 0.961(15) . ? 
C4 H4B 0.995(14) . ? 
C6 C17 1.515(2) . ? 
C6 C7 1.540(2) . ? 
C6 H6 0.966(15) . ? 
C7 C8 1.5421(19) . ? 
C7 H7 0.976(17) . ? 
C8 C31 1.464(2) . ? 
C12 C15 1.515(2) . ? 
C12 C14 1.516(2) . ? 
C12 C13 1.517(2) . ? 
C13 H13A 1.028(18) . ? 
C13 H13B 0.98(2) . ? 
C13 H13C 0.97(2) . ? 
C14 H14A 0.970(19) . ? 
C14 H14B 0.973(18) . ? 
C14 H14C 1.04(2) . ? 
C15 H15A 0.982(17) . ? 
C15 H15B 0.993(19) . ? 
C15 H15C 0.99(2) . ? 
C17 C18 1.5061(19) . ? 
C17 H17A 0.978(17) . ? 
C17 H17B 0.944(17) . ? 
C21 C22 1.484(3) . ? 
C21 H21A 1.024(16) . ? 
C21 H21B 1.00(2) . ? 
C22 H22A 0.974(18) . ? 
C22 H22B 1.00(2) . ? 
C22 H22C 1.04(2) . ? 
C27 C28 1.509(2) . ? 
C27 C30 1.515(2) . ? 
C27 C29 1.516(2) . ? 
C28 H28A 0.974(15) . ? 
C28 H28B 1.016(19) . ? 
C28 H28C 1.01(2) . ? 
C29 H29A 0.98(2) . ? 
C29 H29B 1.000(16) . ? 
C29 H29C 1.012(18) . ? 
C30 H30A 1.00(2) . ? 
C30 H30B 1.00(2) . ? 
C30 H30C 1.017(17) . ? 
C31 C32 1.188(2) . ? 
C32 C33 1.460(2) . ? 
C33 H33A 0.92(2) . ? 
C33 H33B 0.92(2) . ? 
C33 H33C 1.03(3) . ? 
  
loop_ 
 _geom_angle_atom_site_label_1 
 _geom_angle_atom_site_label_2 
 _geom_angle_atom_site_label_3 
 _geom_angle 
 _geom_angle_site_symmetry_1 
 _geom_angle_site_symmetry_3 
 _geom_angle_publ_flag 
C6 O5 C4 112.50(11) . . ? 
C9 O11 C12 121.16(11) . . ? 
C18 O20 C21 115.73(12) . . ? 
C24 O23 C7 115.52(11) . . ? 
C24 O26 C27 119.61(11) . . ? 
C9 N1 C2 132.88(11) . . ? 
C9 N1 C8 132.41(11) . . ? 
C2 N1 C8 94.58(11) . . ? 
O16 C2 N1 132.03(14) . . ? 
O16 C2 C3 136.20(14) . . ? 
N1 C2 C3 91.75(10) . . ? 
C4 C3 C2 111.53(12) . . ? 
C4 C3 C8 112.26(11) . . ? 
C2 C3 C8 86.36(11) . . ? 
C4 C3 H3 112.6(10) . . ? 
C2 C3 H3 114.7(9) . . ? 
C8 C3 H3 116.8(9) . . ? 
O5 C4 C3 108.71(12) . . ? 
O5 C4 H4A 110.3(9) . . ? 
C3 C4 H4A 111.0(9) . . ? 
O5 C4 H4B 106.9(9) . . ? 
C3 C4 H4B 111.6(8) . . ? 
H4A C4 H4B 108.3(12) . . ? 
O5 C6 C17 106.44(11) . . ? 
O5 C6 C7 114.33(11) . . ? 
C17 C6 C7 111.30(12) . . ? 
O5 C6 H6 110.7(9) . . ? 
C17 C6 H6 109.0(9) . . ? 
C7 C6 H6 105.1(8) . . ? 
O23 C7 C6 108.47(11) . . ? 
O23 C7 C8 106.78(11) . . ? 
C6 C7 C8 114.93(11) . . ? 
O23 C7 H7 107.6(9) . . ? 
C6 C7 H7 110.3(9) . . ? 
C8 C7 H7 108.4(9) . . ? 
C31 C8 N1 114.42(11) . . ? 
C31 C8 C7 110.88(11) . . ? 
N1 C8 C7 112.71(12) . . ? 
C31 C8 C3 115.44(12) . . ? 
N1 C8 C3 87.11(10) . . ? 
C7 C8 C3 114.47(11) . . ? 
O10 C9 O11 128.73(14) . . ? 
O10 C9 N1 123.42(12) . . ? 
O11 C9 N1 107.85(11) . . ? 
O11 C12 C15 109.44(12) . . ? 
O11 C12 C14 109.65(13) . . ? 
C15 C12 C14 112.65(15) . . ? 
O11 C12 C13 101.48(12) . . ? 
C15 C12 C13 111.58(13) . . ? 
C14 C12 C13 111.46(13) . . ? 
C12 C13 H13A 111.2(9) . . ? 
C12 C13 H13B 108.2(11) . . ? 
H13A C13 H13B 111.3(15) . . ? 
C12 C13 H13C 108.9(11) . . ? 
H13A C13 H13C 107.6(15) . . ? 
H13B C13 H13C 109.6(16) . . ? 
C12 C14 H14A 109.2(11) . . ? 
C12 C14 H14B 111.3(11) . . ? 
H14A C14 H14B 108.7(15) . . ? 
C12 C14 H14C 110.7(11) . . ? 
H14A C14 H14C 105.4(15) . . ? 
H14B C14 H14C 111.3(16) . . ? 
C12 C15 H15A 113.1(11) . . ? 
C12 C15 H15B 111.9(11) . . ? 
H15A C15 H15B 110.0(14) . . ? 
C12 C15 H15C 107.7(11) . . ? 
H15A C15 H15C 107.8(15) . . ? 
H15B C15 H15C 106.0(15) . . ? 
C18 C17 C6 110.58(12) . . ? 
C18 C17 H17A 110.6(9) . . ? 
C6 C17 H17A 112.4(10) . . ? 
C18 C17 H17B 107.3(10) . . ? 
C6 C17 H17B 108.5(11) . . ? 
H17A C17 H17B 107.3(13) . . ? 
O19 C18 O20 123.74(13) . . ? 
O19 C18 C17 123.78(14) . . ? 
O20 C18 C17 112.46(12) . . ? 
O20 C21 C22 108.08(13) . . ? 
O20 C21 H21A 96.8(8) . . ? 
C22 C21 H21A 110.9(9) . . ? 
O20 C21 H21B 108.9(12) . . ? 
C22 C21 H21B 110.8(12) . . ? 
H21A C21 H21B 119.9(14) . . ? 
C21 C22 H22A 114.2(10) . . ? 
C21 C22 H22B 110.8(12) . . ? 
H22A C22 H22B 106.4(15) . . ? 
C21 C22 H22C 109.8(11) . . ? 
H22A C22 H22C 108.1(16) . . ? 
H22B C22 H22C 107.3(16) . . ? 
O25 C24 O26 128.80(12) . . ? 
O25 C24 O23 125.20(13) . . ? 
O26 C24 O23 105.99(12) . . ? 
O26 C27 C28 102.29(11) . . ? 
O26 C27 C30 109.13(11) . . ? 
C28 C27 C30 111.37(14) . . ? 
O26 C27 C29 109.35(12) . . ? 
C28 C27 C29 111.30(12) . . ? 
C30 C27 C29 112.86(14) . . ? 
C27 C28 H28A 109.5(9) . . ? 
C27 C28 H28B 111.4(11) . . ? 
H28A C28 H28B 108.7(13) . . ? 
C27 C28 H28C 111.9(11) . . ? 
H28A C28 H28C 107.3(14) . . ? 
H28B C28 H28C 108.0(15) . . ? 
C27 C29 H29A 109.7(11) . . ? 
C27 C29 H29B 108.8(10) . . ? 
H29A C29 H29B 110.3(14) . . ? 
C27 C29 H29C 109.2(10) . . ? 
H29A C29 H29C 108.5(15) . . ? 
H29B C29 H29C 110.4(13) . . ? 
C27 C30 H30A 109.9(11) . . ? 
C27 C30 H30B 108.8(11) . . ? 
H30A C30 H30B 110.4(15) . . ? 
C27 C30 H30C 108.5(9) . . ? 
H30A C30 H30C 109.1(14) . . ? 
H30B C30 H30C 110.1(15) . . ? 
C32 C31 C8 175.56(15) . . ? 
C31 C32 C33 179.33(18) . . ? 
C32 C33 H33A 114.3(14) . . ? 
C32 C33 H33B 110.8(15) . . ? 
H33A C33 H33B 112(2) . . ? 
C32 C33 H33C 106.6(16) . . ? 
H33A C33 H33C 106(2) . . ? 
H33B C33 H33C 106(2) . . ? 
  
loop_ 
 _geom_torsion_atom_site_label_1 
 _geom_torsion_atom_site_label_2 
 _geom_torsion_atom_site_label_3 
 _geom_torsion_atom_site_label_4 
 _geom_torsion 
 _geom_torsion_site_symmetry_1 
 _geom_torsion_site_symmetry_2 
 _geom_torsion_site_symmetry_3 
 _geom_torsion_site_symmetry_4 
 _geom_torsion_publ_flag 
C9 N1 C2 O16 -2.0(3) . . . . ? 
C8 N1 C2 O16 -177.99(16) . . . . ? 
C9 N1 C2 C3 179.51(15) . . . . ? 
C8 N1 C2 C3 3.47(11) . . . . ? 
O16 C2 C3 C4 -69.2(2) . . . . ? 
N1 C2 C3 C4 109.24(12) . . . . ? 
O16 C2 C3 C8 178.29(18) . . . . ? 
N1 C2 C3 C8 -3.28(10) . . . . ? 
C6 O5 C4 C3 -73.92(14) . . . . ? 
C2 C3 C4 O5 -48.30(15) . . . . ? 
C8 C3 C4 O5 46.73(15) . . . . ? 
C4 O5 C6 C17 164.93(11) . . . . ? 
C4 O5 C6 C7 41.62(16) . . . . ? 
C24 O23 C7 C6 -123.08(12) . . . . ? 
C24 O23 C7 C8 112.52(12) . . . . ? 
O5 C6 C7 O23 -106.66(13) . . . . ? 
C17 C6 C7 O23 132.69(11) . . . . ? 
O5 C6 C7 C8 12.74(18) . . . . ? 
C17 C6 C7 C8 -107.90(14) . . . . ? 
C9 N1 C8 C31 -62.74(19) . . . . ? 
C2 N1 C8 C31 113.32(13) . . . . ? 
C9 N1 C8 C7 65.17(19) . . . . ? 
C2 N1 C8 C7 -118.76(12) . . . . ? 
C9 N1 C8 C3 -179.46(15) . . . . ? 
C2 N1 C8 C3 -3.39(11) . . . . ? 
O23 C7 C8 C31 -47.21(15) . . . . ? 
C6 C7 C8 C31 -167.56(12) . . . . ? 
O23 C7 C8 N1 -176.96(10) . . . . ? 
C6 C7 C8 N1 62.70(16) . . . . ? 
O23 C7 C8 C3 85.54(13) . . . . ? 
C6 C7 C8 C3 -34.80(17) . . . . ? 
C4 C3 C8 C31 135.56(13) . . . . ? 
C2 C3 C8 C31 -112.65(13) . . . . ? 
C4 C3 C8 N1 -108.70(13) . . . . ? 
C2 C3 C8 N1 3.09(10) . . . . ? 
C4 C3 C8 C7 4.99(17) . . . . ? 
C2 C3 C8 C7 116.79(12) . . . . ? 
C12 O11 C9 O10 0.9(2) . . . . ? 
C12 O11 C9 N1 -178.19(11) . . . . ? 
C2 N1 C9 O10 5.2(2) . . . . ? 
C8 N1 C9 O10 179.81(14) . . . . ? 
C2 N1 C9 O11 -175.66(13) . . . . ? 
C8 N1 C9 O11 -1.0(2) . . . . ? 
C9 O11 C12 C15 62.42(16) . . . . ? 
C9 O11 C12 C14 -61.60(17) . . . . ? 
C9 O11 C12 C13 -179.56(13) . . . . ? 
O5 C6 C17 C18 163.23(11) . . . . ? 
C7 C6 C17 C18 -71.59(14) . . . . ? 
C21 O20 C18 O19 -2.5(2) . . . . ? 
C21 O20 C18 C17 178.70(14) . . . . ? 
C6 C17 C18 O19 -43.2(2) . . . . ? 
C6 C17 C18 O20 135.51(13) . . . . ? 
C18 O20 C21 C22 170.17(15) . . . . ? 
C27 O26 C24 O25 -0.6(2) . . . . ? 
C27 O26 C24 O23 -179.75(10) . . . . ? 
C7 O23 C24 O25 6.26(19) . . . . ? 
C7 O23 C24 O26 -174.55(10) . . . . ? 
C24 O26 C27 C28 179.17(12) . . . . ? 
C24 O26 C27 C30 -62.77(17) . . . . ? 
C24 O26 C27 C29 61.11(16) . . . . ? 
N1 C8 C31 C32 174(2) . . . . ? 
C7 C8 C31 C32 45(2) . . . . ? 
C3 C8 C31 C32 -87(2) . . . . ? 
C8 C31 C32 C33 52(16) . . . . ? 
  
_diffrn_measured_fraction_theta_max    0.995 
_diffrn_reflns_theta_full              27.50 
_diffrn_measured_fraction_theta_full   0.995 
_refine_diff_density_max    0.590 
_refine_diff_density_min   -0.366 
_refine_diff_density_rms    0.050 
